# Supplementary material for: Resolving the difference between left-sided and right-sided colorectal cancer by single-cell sequencing
Source: JCI journal article supplement (doi:10.1172/jci.insight.152616), 2021-11-18
Supplement: sd1 [file 1]

**Figure S1**

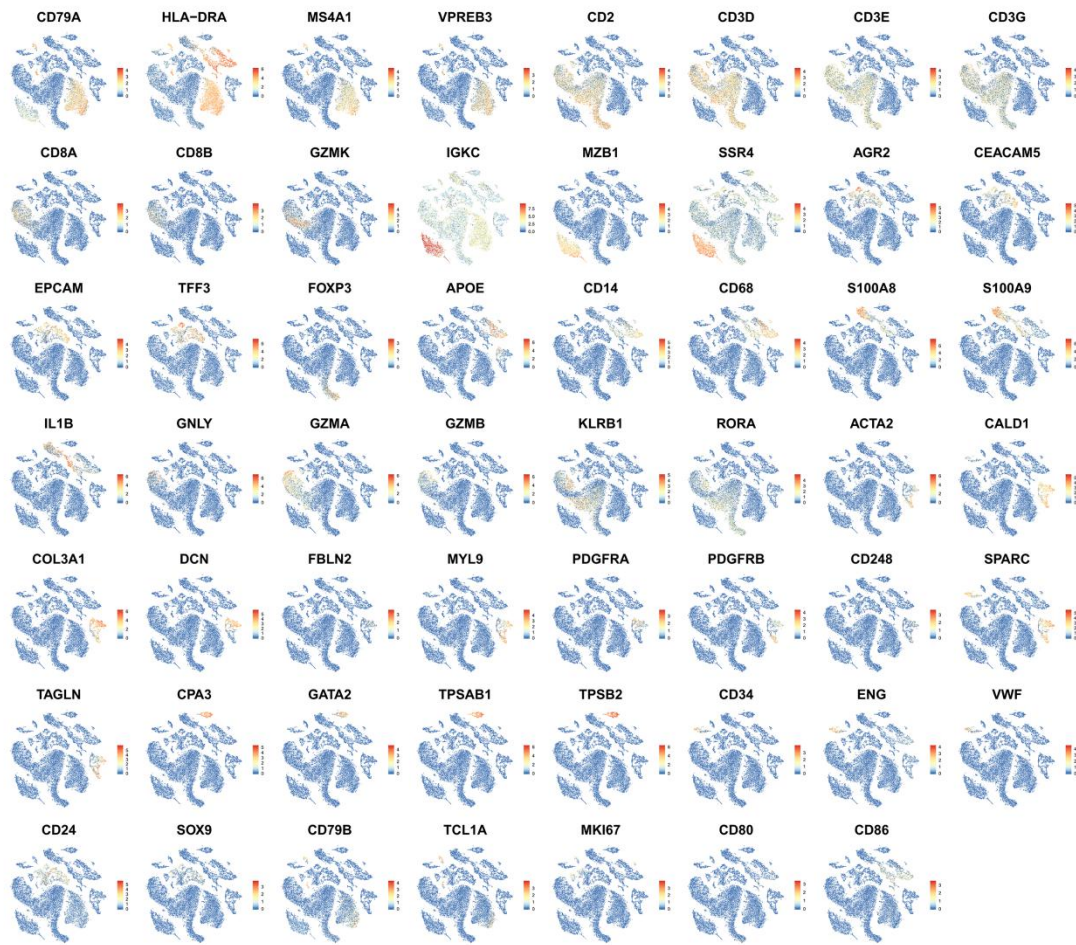

**Figure S1** Selected gene expression in 27,927 T cells.

Figure S2

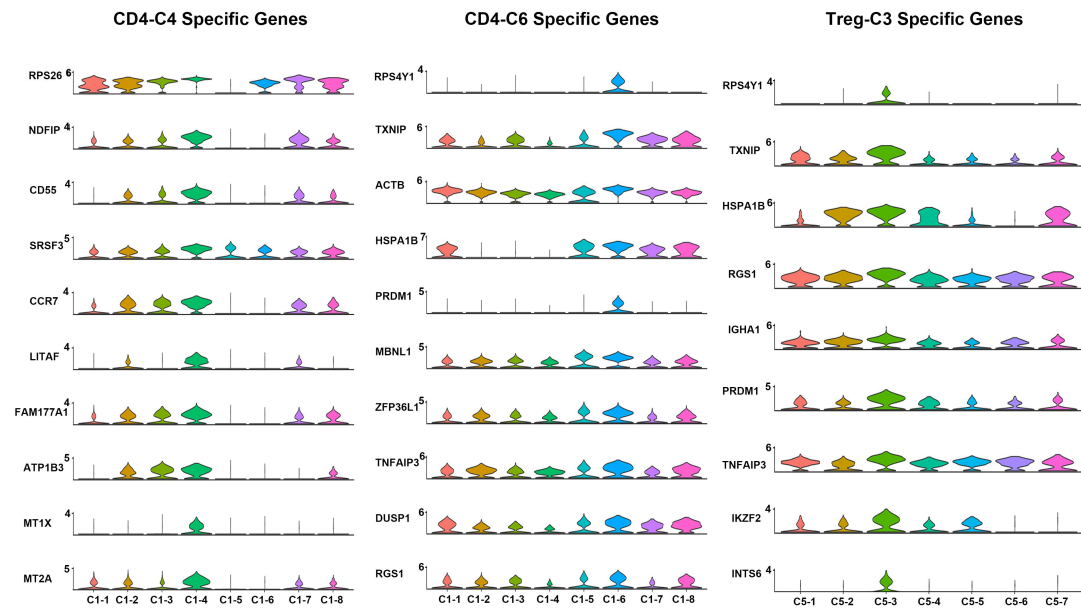

Figure S2 Violin plots of specific genes of CD4-C4, CD4-C6 and Treg-C3.

Figure S3

### Specific Genes of Cancer Cell clusters

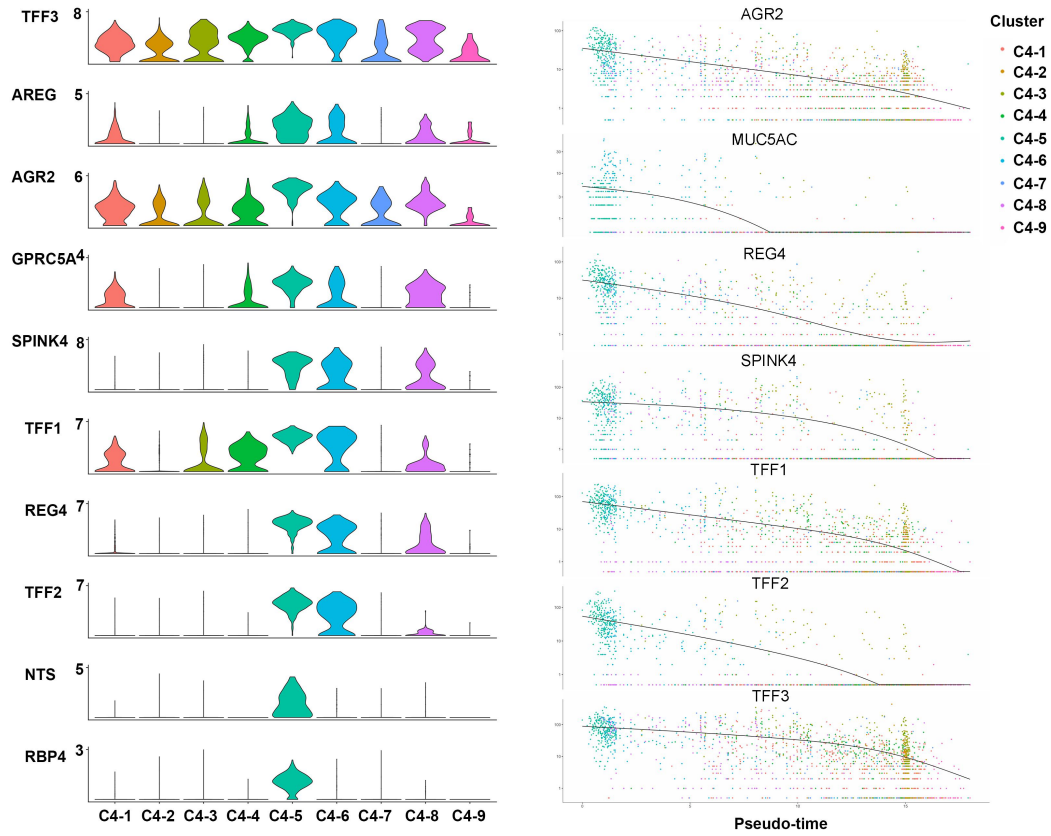

Figure S3 Specific genes of cancer cell cluster.

Figure S4

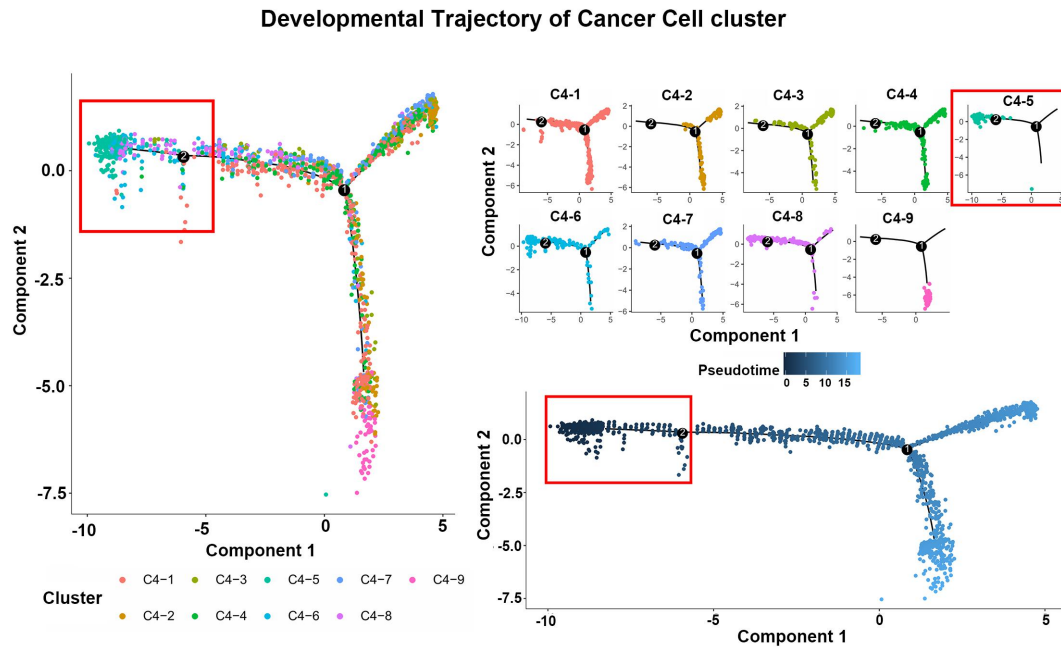

Figure S4 Developmental trajectory for cancer cell cluster.

Table S1 Clinical characteristics of six CRC patients enrolled in our study.

| Patient No.               | Sex    | Age | Tumor Location | Tumor Size(cm) | AJCC Stage | LN metastasis | Distant metastasis | MSI status | Metabolic disorders |
|---------------------------|--------|-----|----------------|----------------|------------|---------------|--------------------|------------|---------------------|
| Left-sided CRC Patient 1  | Female | 57  | Sigmoid        | 1.5 x 0.5      | I          | No            | No                 | MSS        | No                  |
| Left-sided CRC Patient 2  | Male   | 70  | Sigmoid        | 3 x 1          | II         | No            | No                 | MSS        | No                  |
| Left-sided CRC Patient 3  | Male   | 65  | Sigmoid        | 2 x 1.5        | I          | No            | No                 | MSS        | No                  |
| Right-sided CRC Patient 1 | Female | 69  | Ascending      | 8 x 1.7        | II         | No            | No                 | MSS        | No                  |
| Right-sided CRC Patient 2 | Female | 80  | Ascending      | 8 x 3.2        | II         | No            | No                 | MSS        | No                  |
| Right-sided CRC Patient 3 | Male   | 59  | Ascending      | 10 x 5.5       | II         | No            | No                 | MSS        | No                  |

Abbreviation: AJCC, American Joint Committee on Cancer; LN, lymph node; MSI, microsatellite instability.

**Table S1** Clinical characteristics of six CRC patients enrolled in this study.
